# Supplementary material for: Neurodegeneration in Patients with Type 2 Diabetes Mellitus without Diabetic Retinopathy
Source: J Ophthalmol. 2019 Aug 7;2019:1825819. doi: 10.1155/2019/1825819 (PMC6702840; doi:10.1155/2019/1825819)
Supplement: Supplementary Materials — Supplementary Table 1: diagnostic criteria for diabetes mellitus according to the American Diabetes Association. Supplementary Table 2: demographic and epidemiologic data of patients with type 2 diabetes mellitus included in the study. [file 1825819.f1.zip]

Archive with 2 entries (2 files):
- 1825819.f1/Suppl table 1.docx
- 1825819.f1/Suppl table 2.docx
